# Supplementary material for: Collagen Induced Arthritis in DBA/1J Mice Associates with Oxylipin Changes in Plasma
Source: PubMed Central journal article supplement (PMC4641941; doi:10.1155/2015/543541), 2015-10-29
Supplement: 543541.f1.pdf [file 543541.f1.pdf]

## **Supplementary figures**

**Figure S1. Recovery(%)of 15 deuterated oxylipins ISTDs . Oxylipins recovery for SPE extraction method was displayed in forms of percentage value.**

**Figure S2. Score plot of PLS-DA based on metabolic profiling in CIA model group and Ctrl group.**

**Figure S3 Variable Importance in the Projection(VIP) scores of detected oxylipins based on PLS-DA.**

Fourteen oxylipins showed VIP score higher than 1, while another two are extremely closer to 1(0.96 and 0.95 respectively). The regulation information of increase (■) and decrease (□) are given in the right side of the figure.

Figure S1. Recovery(%)of 15 deuterated oxylipins ISTDs.

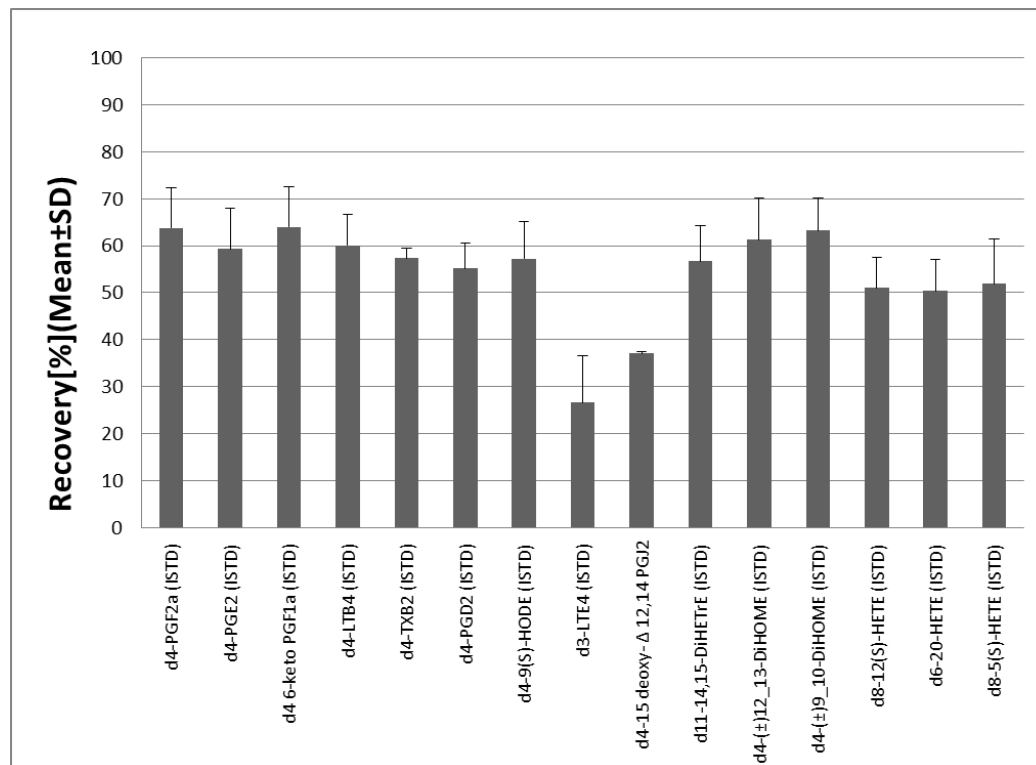

Figure S2. Score plot of PLS-DA based on metabolic profiling in CIA model group and Ctrl group.

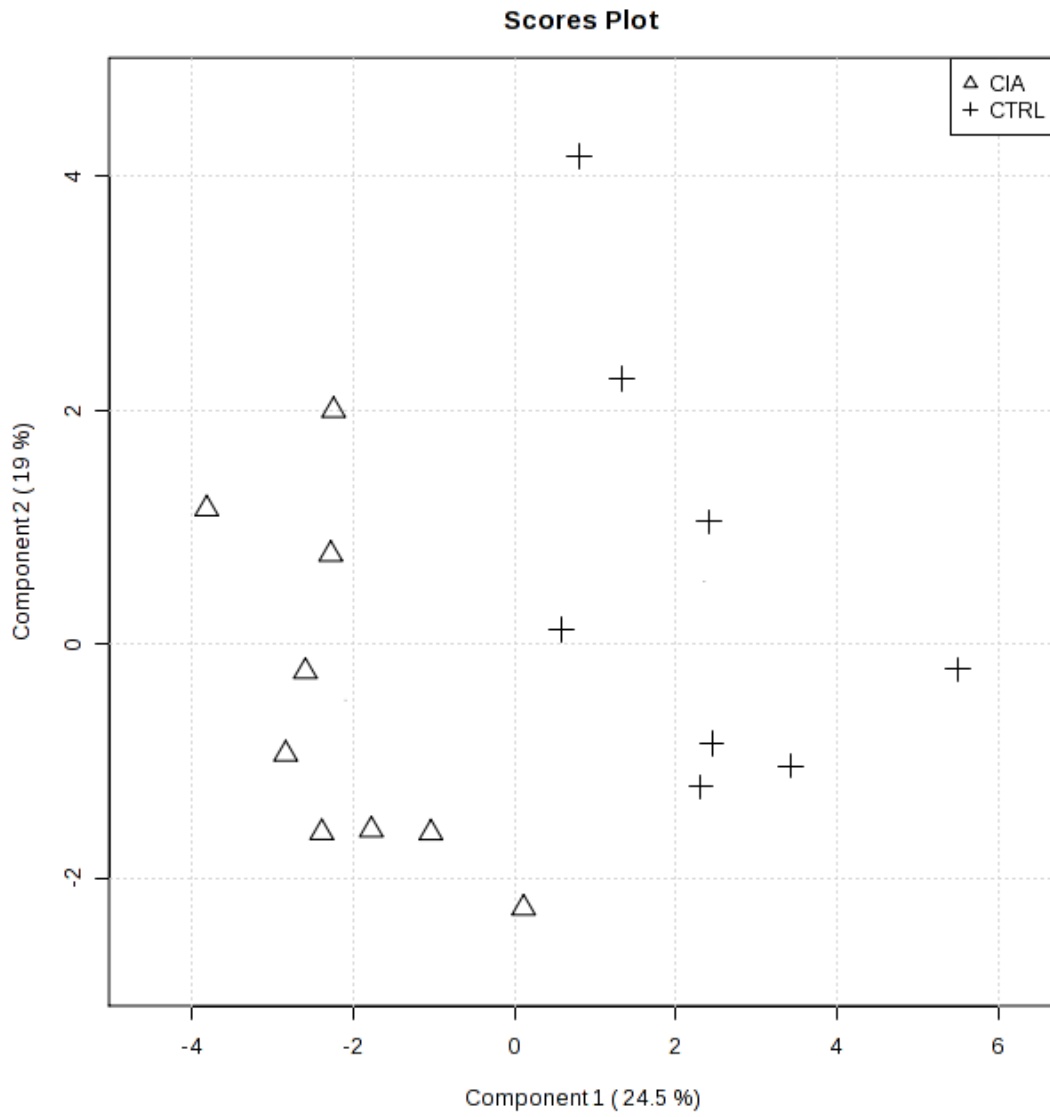

Figure S3. Variable Importance in the Projection(VIP) scores of detected oxylipins based on PLS-DA.

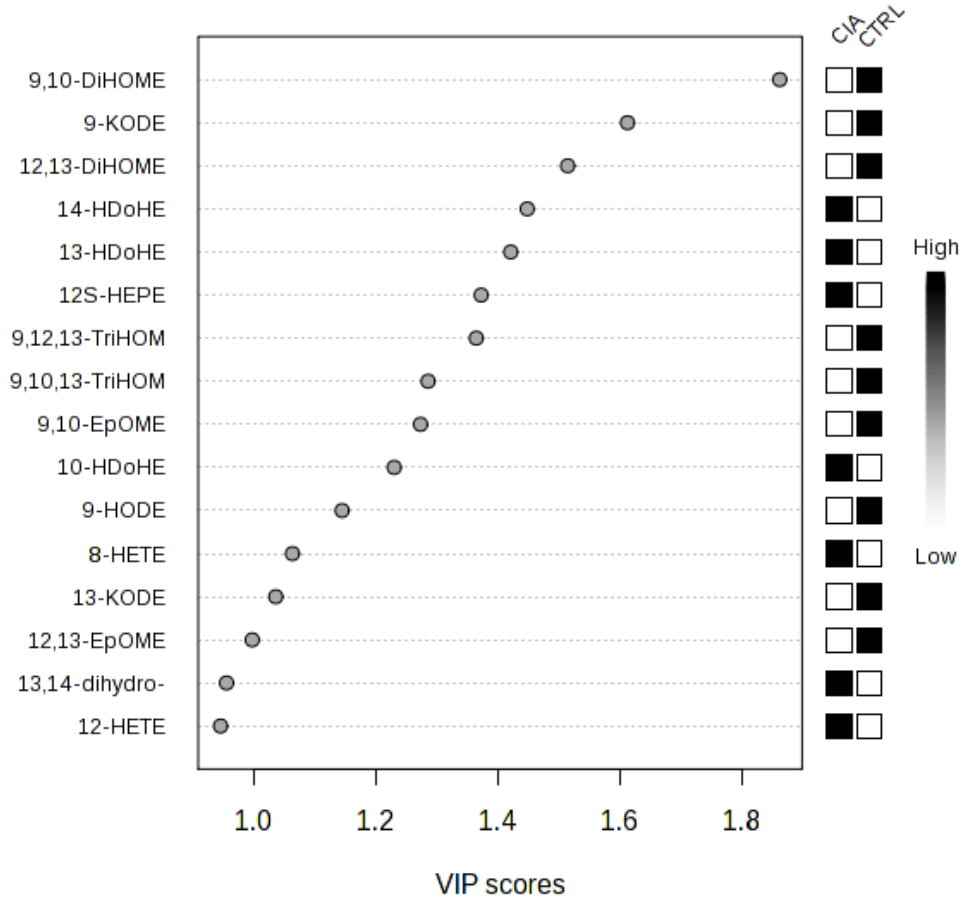

## Supplementary tables

Table S1. Linearity( $R^2$ ), reproducibility(RSD), Limitation of detection(LOD) and quantitation(LOQ) of LC/ESI-MS/MS for oxylipins detected in mice plasma.

^: oxylipins were also detected in the study samples.

Table S2. Details of detected oxylipins in mice plasma using LC-MS/MS analysis. The table contains 30 oxylipins detected in study mice plasma, with their information of Mass (precursor ions accompanied with product ions) as well as the selected internal standard for ratio calculation and correction, ranked by their retention time. For oxylipins platform, RSD is acceptable if less than 35% because of the less stability and low concentration levels of oxylipins. 30 oxylipins were reliable with  $RSD < 35\%$  .

Table S1. Linearity( $R^2$ ), reproducibility(RSD), Limitation of detection(LOD) and quantitation(LOQ) of LC/ESI-MS/MS for oxylipins detected in mice plasma.

| Oxylipins                    | Chemical class        | $R^2$ | RSD[%] | LOD[nM] | LOQ[nM] |
|------------------------------|-----------------------|-------|--------|---------|---------|
| <b>AA</b>                    |                       |       |        |         |         |
| 12S-HHTrE ^                  | Alcohols              | 0.999 | 12     | 1       | 3.5     |
| 20-HETE                      | Alcohols              | 0.999 | 11     | 6.1     | 20.2    |
| 15-HETE^                     | Alcohols              | 0.904 | 26     | 2.6     | 8.8     |
| 11-HETE^                     | Alcohols              | 0.963 | 12     | 0.6     | 1.8     |
| 12-HETE ^                    | Alcohols              | 0.794 | 7      | 15.6    | 52.1    |
| 8-HETE^                      | Alcohols              | 0.95  | 30     | 13.1    | 43.5    |
| 9-HETE ^                     | Alcohols              | 0.932 | 19     | 33.9    | 113     |
| 5-HETE^                      | Alcohols              | 0.82  | 17     | 5.2     | 17.4    |
| 5S,6R-LipoxinA4              | Diols                 | 0.994 | 4      | 1.5     | 5.1     |
| 5S,6S-Lipoxin A4             | Diols                 | 0.996 | 5      | 4.4     | 14.5    |
| 6-trans-LTB4                 | Diols                 | 0.99  | 7      | 8.3     | 27.5    |
| LTB4                         | Diols                 | 0.999 | 12     | 0.4     | 1.3     |
| 14,15-DiHETrE ^              | Diols                 | 1     | 9      | 0.4     | 1.4     |
| 11,12-DiHETrE                | Diols                 | 0.999 | 14     | 1.6     | 5.5     |
| 8,9-DiHETrE                  | Diols                 | 0.999 | 17     | 0.7     | 2.4     |
| 5,6-DiHETrE                  | Diols                 | 0.999 | 5      | 18.8    | 62.6    |
| 14,15-EpETrE                 | Epoxides              | 0.847 | 7      | 3.7     | 12.4    |
| 5,6-EpETrE                   | Epoxides              | 0.999 | 8      | 3.9     | 12.8    |
| 12S-HpETE                    | Hydroperoxides        | 0.902 | 10     | 116.7   | 389.1   |
| 5S-HpETE                     | Hydroperoxides        | 1     | 27     | 0.4     | 1.3     |
| 15-KETE                      | Ketones               | 0.998 | 32     | 4.8     | 16      |
| 5-KETE                       | Ketones               | 0.985 | 32     | 39.1    | 130.4   |
| 8-iso-PGF2a                  | Prostanoids/throboids | 1     | 13     | 0.5     | 1.7     |
| 5- $\beta$ PGF2a-VI          | Prostanoids/throboids | 1     | 10     | 0.1     | 0.3     |
| TXB2 ^                       | Prostanoids/throboids | 0.999 | 10     | 1.3     | 4.5     |
| PGF2a ^                      | Prostanoids/throboids | 0.999 | 11     | 0.9     | 2.8     |
| PGE2                         | Prostanoids/throboids | 0.998 | 12     | 1.9     | 6.2     |
| 11beta-PGE2                  | Prostanoids/throboids | 0.998 | 6      | 2.5     | 8.5     |
| 13,14-dihydro-PGF2a ^        | Prostanoids/throboids | 1     | 13     | 4.1     | 13.8    |
| 13,14-dihydro-15-keto-PGF2a^ | Prostanoids/throboids | 1     | 9      | 1.94    | 6.48    |
| PGA2                         | Prostanoids/throboids | 0.998 | 8      | 2.3     | 7.7     |
| PGI2                         | Prostanoids/throboids | 1     | 6      | 0.03    | 0.1     |
| d12-PGI2                     | Prostanoids/throboids | 0.995 | 10     | 2.3     | 7.6     |
| PGD2                         | Prostanoids/throboids | 0.996 | 6      | 2.5     | 8.5     |
| HepoxilinA3                  | Prostanoids/throboids | 0.992 | 7      | 57.7    | 192.3   |
| <b>ALA</b>                   |                       |       |        |         |         |
| 9-HOTrE                      | Alcohols              | 0.998 | 12     | 0.3     | 1       |
| 12,13-DiHODE                 | Diols                 | 0.993 | 13     | 54.5    | 181.8   |
| <b>DGLA</b>                  |                       |       |        |         |         |
| 15S-HETrE                    | Alcohols              | 0.998 | 27     | 1.3     | 4.3     |
| 8-HETrE^                     | Alcohols              | 0.979 | 15     | 2.8     | 9.2     |
| 5-HETrE                      | Alcohols              | 0.999 | 23     | 1.6     | 5.4     |
| 6-keto-PGF1a^                | Prostanoids/throboids | 1     | 15     | 1.08    | 3.62    |
| <b>DHA</b>                   |                       |       |        |         |         |
| 17-HDoHE^                    | Alcohols              | 0.988 | 10     | 0.4     | 1.2     |
| 20-HDoHE                     | Alcohols              | 0.993 | 14     | 4.8     | 15.8    |
| 16-HDoHE                     | Alcohols              | 0.983 | 13     | 7.6     | 25.5    |
| 13-HDoHE^                    | Alcohols              | 0.977 | 11     | 113.9   | 379.6   |
| 14-HDoHE^                    | Alcohols              | 0.900 | 9      | 13.7    | 45.7    |
| 10-HDoHE ^                   | Alcohols              | 0.974 | 13     | 8.8     | 29.3    |
| 7-HDoHE                      | Alcohols              | 0.991 | 9      | 0.1     | 0.4     |
| 11-HDoHE                     | Alcohols              | 0.986 | 9      | 3.6     | 11.8    |
| 4-HDoHE                      | Alcohols              | 0.976 | 22     | 29.6    | 98.5    |
| 8-HDoHE                      | Alcohols              | 0.92  | 19     | 14      | 46.8    |
| 10S,17S-DiHDoHE              | Diols                 | 1     | 4      | 1.6     | 5.4     |
| 19,20-DiHDPa ^               | Diols                 | 1     | 19     | 3.6     | 11.9    |
| 19,20-EpDPE                  | Epoxides              | 0.984 | 16     | 95.6    | 318.7   |
| <b>EPA</b>                   |                       |       |        |         |         |
| 18-HEPE                      | Alcohols              | 0.991 | 19     | 29.9    | 99.7    |
| 15-HEPE                      | Alcohols              | 0.999 | 25     | 7.6     | 25.3    |
| 12-HEPE ^                    | Alcohols              | 0.939 | 11     | 12.3    | 40.8    |
| 9-HEPE                       | Alcohols              | 0.995 | 15     | 4.8     | 16.1    |
| 5-HEPE                       | Alcohols              | 0.999 | 25     | 1.2     | 4       |
| 8S,15S-DiHETE                | Diols                 | 0.832 | 3      | 40.3    | 134.4   |
| 5S,15S-DiHETE                | Diols                 | 0.998 | 4      | 8.2     | 27.2    |
| 5S,6S-DiHETE                 | Diols                 | 1     | 9      | 3.0     | 10.1    |
| <b>LA</b>                    |                       |       |        |         |         |
| 13-HODE ^                    | Alcohols              | 0.884 | 9      | 2.7     | 9.2     |
| 9-HODE ^                     | Alcohols              | 0.903 | 8      | 1.6     | 5.3     |
| 12,13-DiHOME ^               | Diols                 | 1     | 3      | 0.9     | 3       |
| 9,10-DiHOME ^                | Diols                 | 0.999 | 5      | 0.6     | 2.1     |
| 12,13-EpOME ^                | Epoxides              | 1     | 9      | 1.6     | 5.3     |
| 9,10-EpOME ^                 | Epoxides              | 0.999 | 26     | 1.1     | 3.7     |
| 13-KODE^                     | Ketones               | 0.996 | 6      | 1.4     | 4.7     |
| 9-KODE^                      | Ketones               | 0.998 | 9      | 0.6     | 1.9     |
| 9,12,13-TriHOME ^            | Triols                | 0.994 | 8      | 1       | 3.3     |
| 9,10,13-TriHOME ^            | Triols                | 0.996 | 9      | 2.7     | 9.1     |

Table S2. Details of detected oxylipins in study mice plasma using LC-MS/MS analysis.

| Compounds                       | Lipid Maps ID | Mass<br>(precursor ion → product<br>ions) | Retention<br>Time | Internal standard  | Precision<br>RSD[%] | FA<br>group | Chemical class |
|---------------------------------|---------------|-------------------------------------------|-------------------|--------------------|---------------------|-------------|----------------|
| 6-keto-PGF1a                    | LMFA03010001  | 369.2-> 163.1                             | 5.21              | d4 6-keto PGF1a    | 6.9                 | DGLA        | Prostanoids    |
| TXB2                            | LMFA03030002  | 369.2-> 169.1                             | 7.05              | d4-TXB2            | 0.4                 | AA          | throboids      |
| 9,12,13-TriHOME                 | LMFA02000014  | 329.2-> 211.2                             | 7.10              | d4-9(S)-HODE       | 26.1                | LA          | Tiols          |
| PGF2a                           | LMFA03010002  | 353.2-> 193.1                             | 7.20              | d4-PGF2a           | 7.7                 | AA          | Prostanoids    |
| 9,10,13-TriHOME                 | LMFA02000168  | 329.2-> 171.1                             | 7.24              | d4-9(S)-HODE       | 19.7                | LA          | Tiols          |
| 13,14-dihydro-PGF2a             | LMFA03010079  | 355.2-> 275.3                             | 8.08              | d4-PGF2a           | 8.7                 | AA          | Prostanoids    |
| 13,14-dihydro-15-<br>keto-PGF2a | LMFA03010027  | 353.2-> 183.1                             | 8.67              | d4-PGF2a           | 5.6                 | AA          | Prostanoids    |
| 12,13-DiHOME                    | LMFA01050351  | 313.2-> 183.2                             | 12.07             | d4-(±)12_13-DiHOME | 14.0                | LA          | Diols          |
| 9,10-DiHOME                     | LMFA01050350  | 313.2-> 201.1                             | 12.46             | d4-(±)9_10-DiHOME  | 34.5                | LA          | Diols          |
| 19,20-DiHDPa                    | LMFA04000043  | 361.2-> 273.3                             | 12.87             | d11-14,15-DiHETrE  | 23.3                | DHA         | Diols          |
| 14,15-DiHETrE                   | LMFA03050010  | 337.2-> 207.2                             | 12.91             | d11-14,15-DiHETrE  | 27.6                | AA          | Diols          |
| 12S-HHTrE                       | LMFA03050002  | 279.2-> 179.2                             | 12.99             | d8-12(S)-HETE      | 30.4                | AA          | Alcohols       |
| 12-HEPE                         | LMFA03070008  | 317.2-> 179.1                             | 14.91             | d8-12(S)-HETE      | 9.4                 | EPA         | Alcohols       |
| 13-HODE                         | LMFA01050349  | 295.2-> 195.2                             | 15.37             | d4-9(S)-HODE       | 5.6                 | LA          | Alcohols       |
| 9-HODE                          | LMFA01050278  | 295.2-> 171.1                             | 15.50             | d4-9(S)-HODE       | 6.5                 | LA          | Alcohols       |
| 15-HETE                         | LMFA03060001  | 319.2-> 219.2                             | 15.83             | d8-5(S)-HETE       | 21.6                | AA          | Alcohols       |
| 13-KODE                         | LMFA02000016  | 293.2-> 113.1                             | 15.96             | d4-9(S)-HODE       | 4.3                 | LA          | Ketones        |
| 17-HDoHE                        | LMFA04000032  | 343.2-> 281.3                             | 16.10             | d8-12(S)-HETE      | 10.7                | DHA         | Alcohols       |
| 11-HETE                         | LMFA03060028  | 319.2-> 167.1                             | 16.23             | d8-12(S)-HETE      | 10.1                | AA          | Alcohols       |
| 14-HDoHE                        | LMFA04000030  | 343.2-> 205.0                             | 16.28             | d8-12(S)-HETE      | 4.9                 | DHA         | Alcohols       |
| 13-HDoHE                        | LMFA04000029  | 343.2-> 281.0                             | 16.29             | d8-12(S)-HETE      | 7.9                 | DHA         | Alcohols       |
| 10-HDoHE                        | LMFA04000027  | 343.2-> 153.0                             | 16.32             | d8-12(S)-HETE      | 26.2                | DHA         | Alcohols       |
| 9-KODE                          | LMFA01060177  | 293.2-> 185.2                             | 16.37             | d4-9(S)-HODE       | 18.3                | LA          | Ketones        |
| 12-HETE                         | LMFA03060088  | 319.2-> 179.2                             | 16.52             | d8-12(S)-HETE      | 13.0                | AA          | Alcohols       |
| 8-HETE                          | LMFA03060006  | 319.2-> 155.1                             | 16.54             | d8-5(S)-HETE       | 6.4                 | AA          | Alcohols       |
| 9-HETE                          | LMFA03060089  | 319.2-> 167.1                             | 16.77             | d8-12(S)-HETE      | 12.3                | AA          | Alcohols       |
| 5-HETE                          | LMFA03060002  | 319.2-> 115.1                             | 17.00             | d8-5(S)-HETE       | 18.2                | AA          | Alcohols       |
| 8-HETrE                         | LMFA03050011  | 321.3-> 303.0                             | 17.06             | d8-12(S)-HETE      | 19.6                | DGLA        | Alcohols       |
| 12,13-EpOME                     | LMFA02000038  | 295.2-> 195.2                             | 17.40             | d4-(±)12_13-DiHOME | 24.3                | LA          | Epoxides       |
| 9,10-EpOME                      | LMFA02000037  | 295.2-> 171.2                             | 17.59             | d4-(±)9_10-DiHOME  | 5.6                 | LA          | Epoxides       |
